# Supplementary material
Source: MDPI journal article supplement (https://www.mdpi.com/2071-1050/11/4/1039)
Supplement: s1 [file sustainability-428367-supplementary.docx]

Supplementary Materials: New Strategies to Improve Co-Management in Enclosed Coastal Seas and Wetlands Subjected to Complex Environments: Socio-economic Analysis Applied to an International Recovery Success Case Study after an Environmental Crisis

Supplementary material: graphic dossier.

Graphic references of the various issues described in the introduction about the process that has occurred in the Mar Menor and its comparison with other cases at an international level.

| 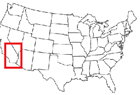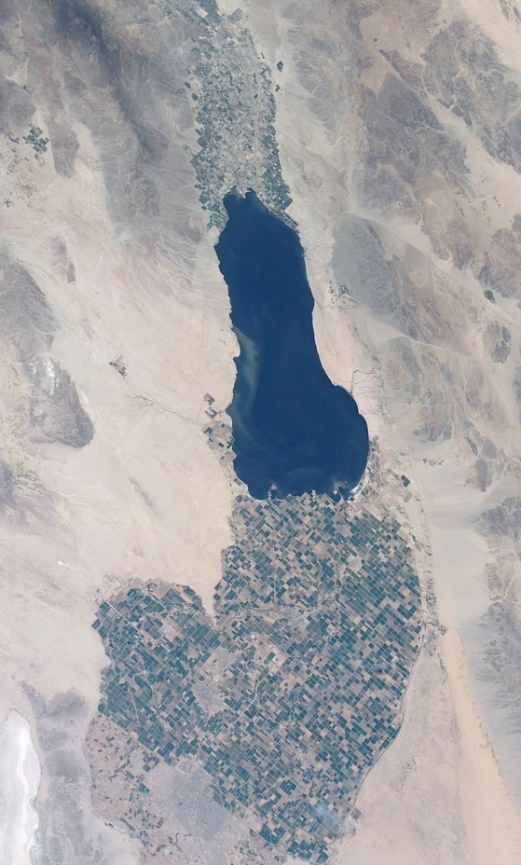  (**a**) | 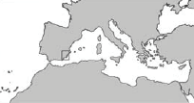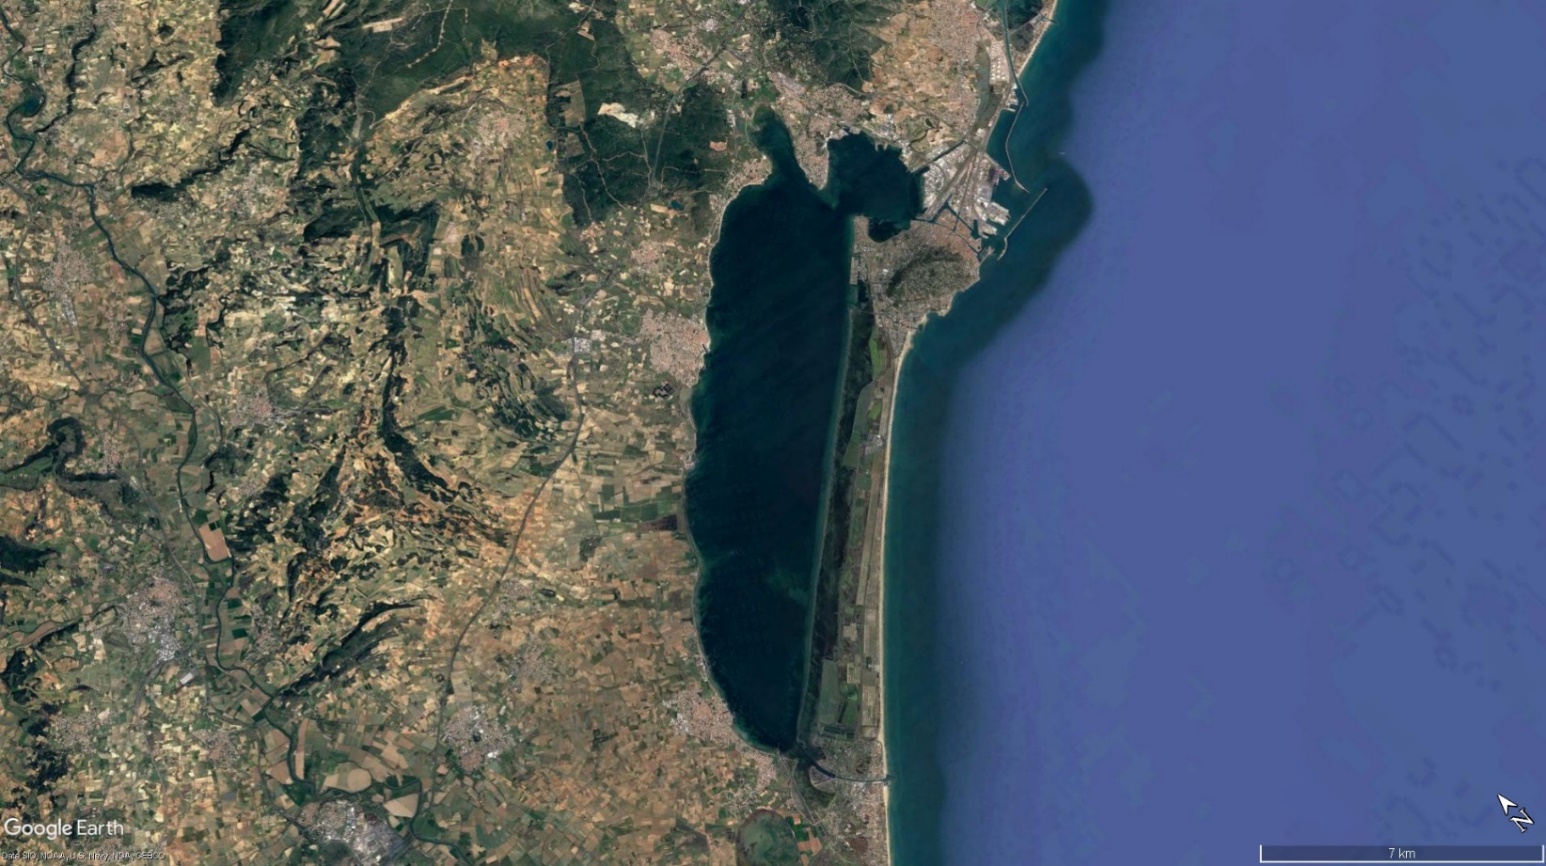  (**b**) |
| --- | --- |

**Figure S1.** Satellite views of (**a**) the Salton Sea in the US; (**b**) the Thau lagoon in France.


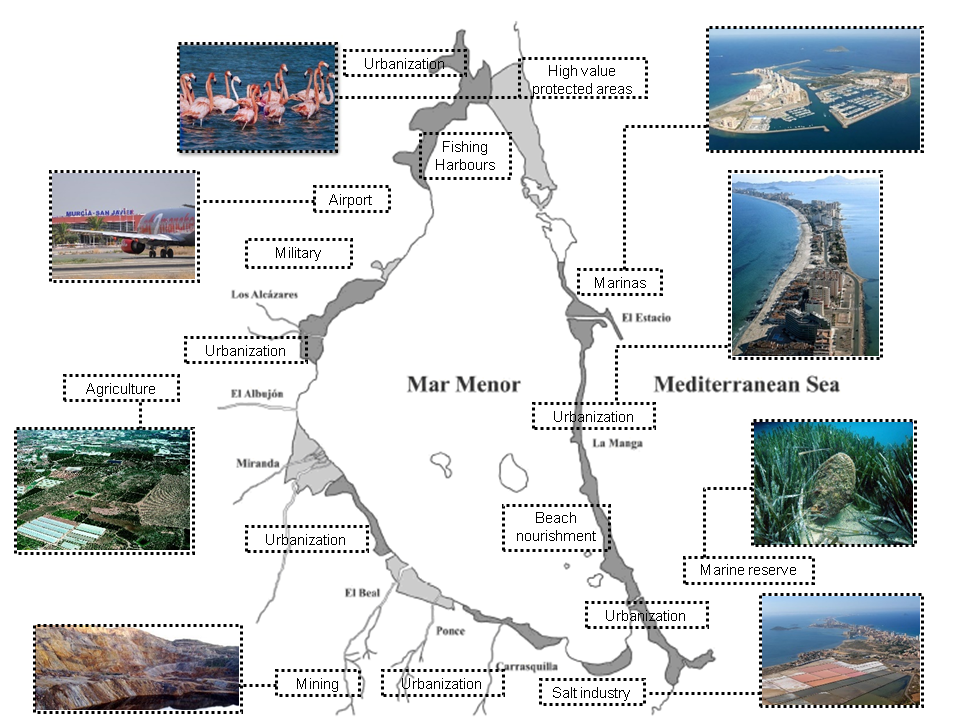


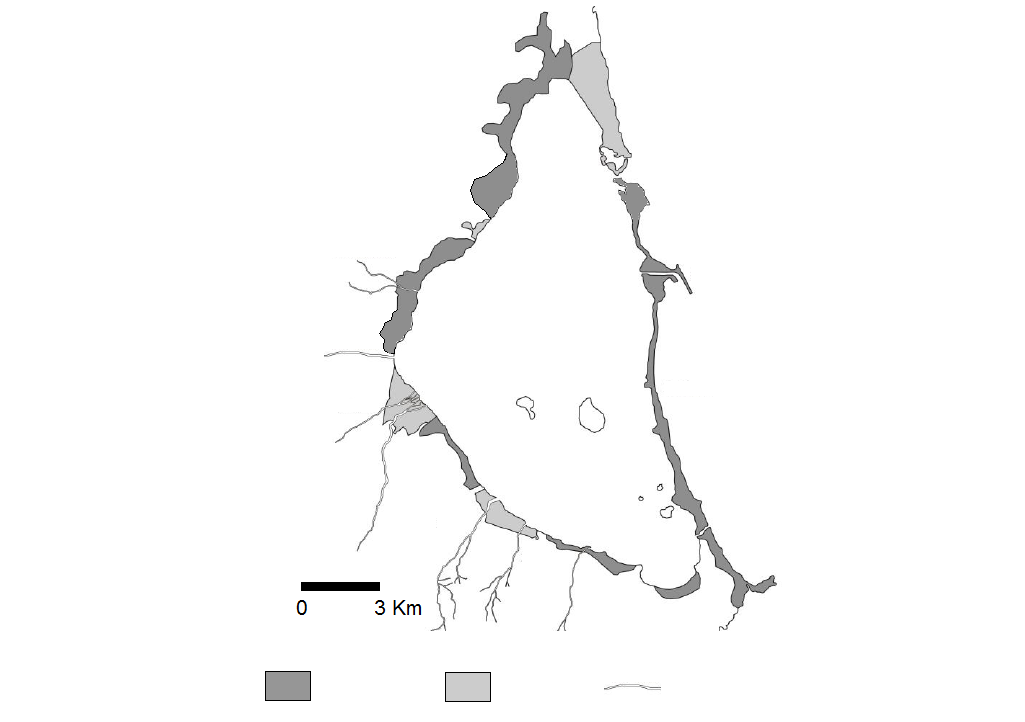


Urbanized areas

Protected areas

Wadis

**Figure S2.** Human activities and environmental values in the Mar Menor.


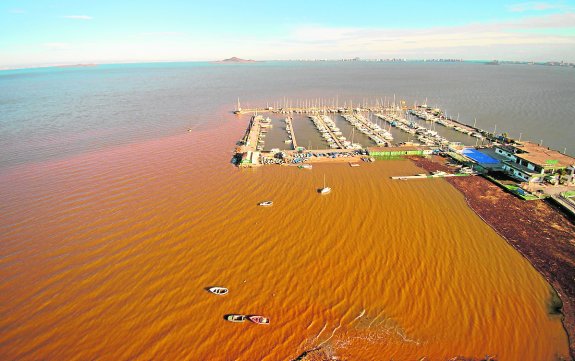

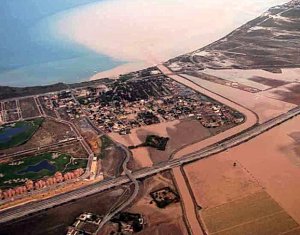

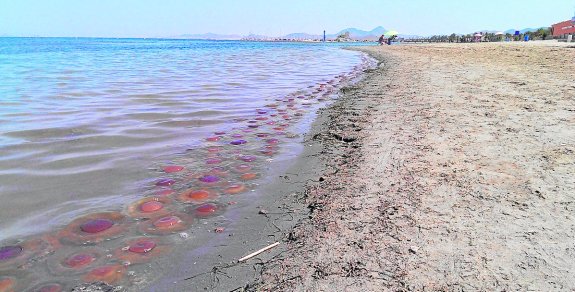

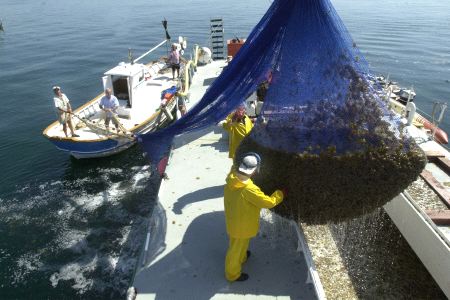


**Figure S3.** Land trawls reach the lagoon during flooding caused by torrential rains (up) and *Cotylorhiza Tuberculata* jellyfish overpopulation collected by fishing vessels to not disturb tourism. (down).


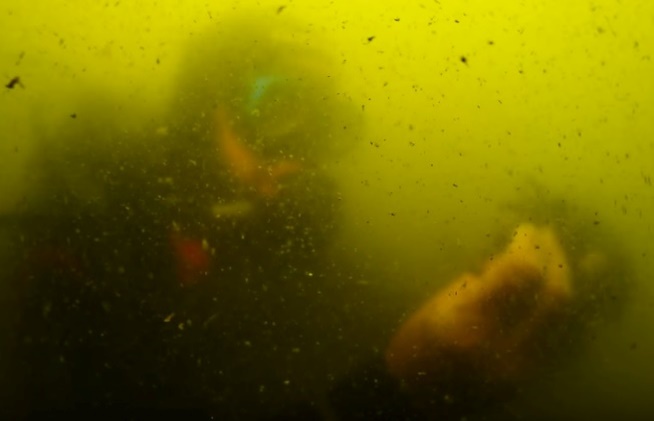

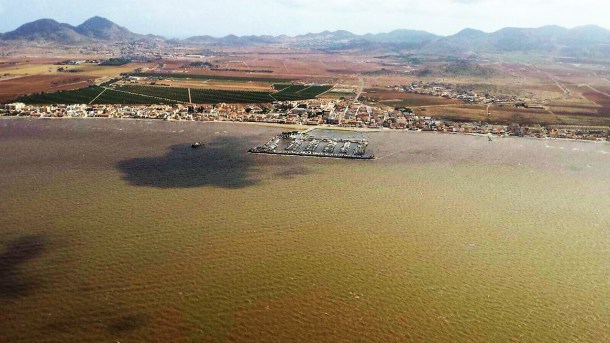

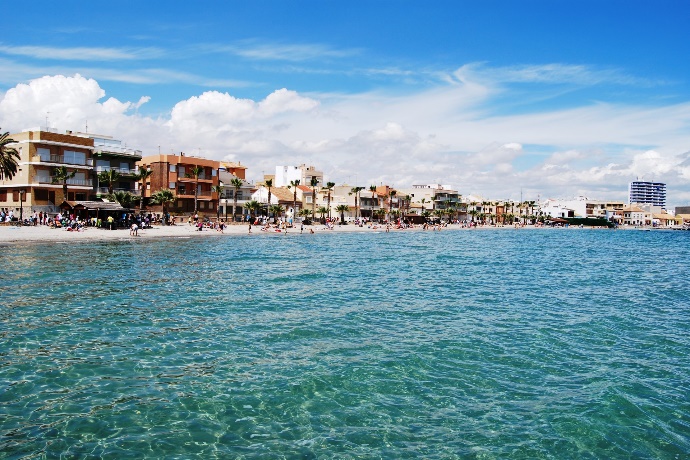

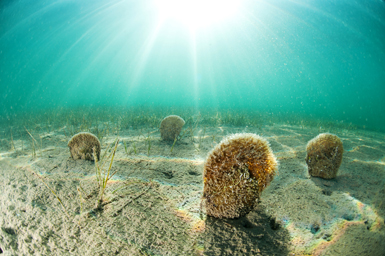


**Figure S4.** Comparative situation in the Mar Menor before (left) and after (right) the eutrophication crisis for the surface appearance of the waters in the coastal settlement of Los Nietos (up) and visibility on the seabed (down). Source: Greenpeace and own elaboration.
